# Supplementary material for: Preparative Isolation and Purification of Three Sesquiterpenoid Lactones from Eupatorium lindleyanum DC. by High-Speed Counter-Current Chromatography
Source: Molecules. 2012 Jul 27;17(8):9002–9. doi: 10.3390/molecules17089002 (PMC6268613; doi:10.3390/molecules17089002)

<sup>1</sup>H-NMR spectroscopy for 3β-Hydroxy-8β-[4'-hydroxytigloyloxy]-costunolide.

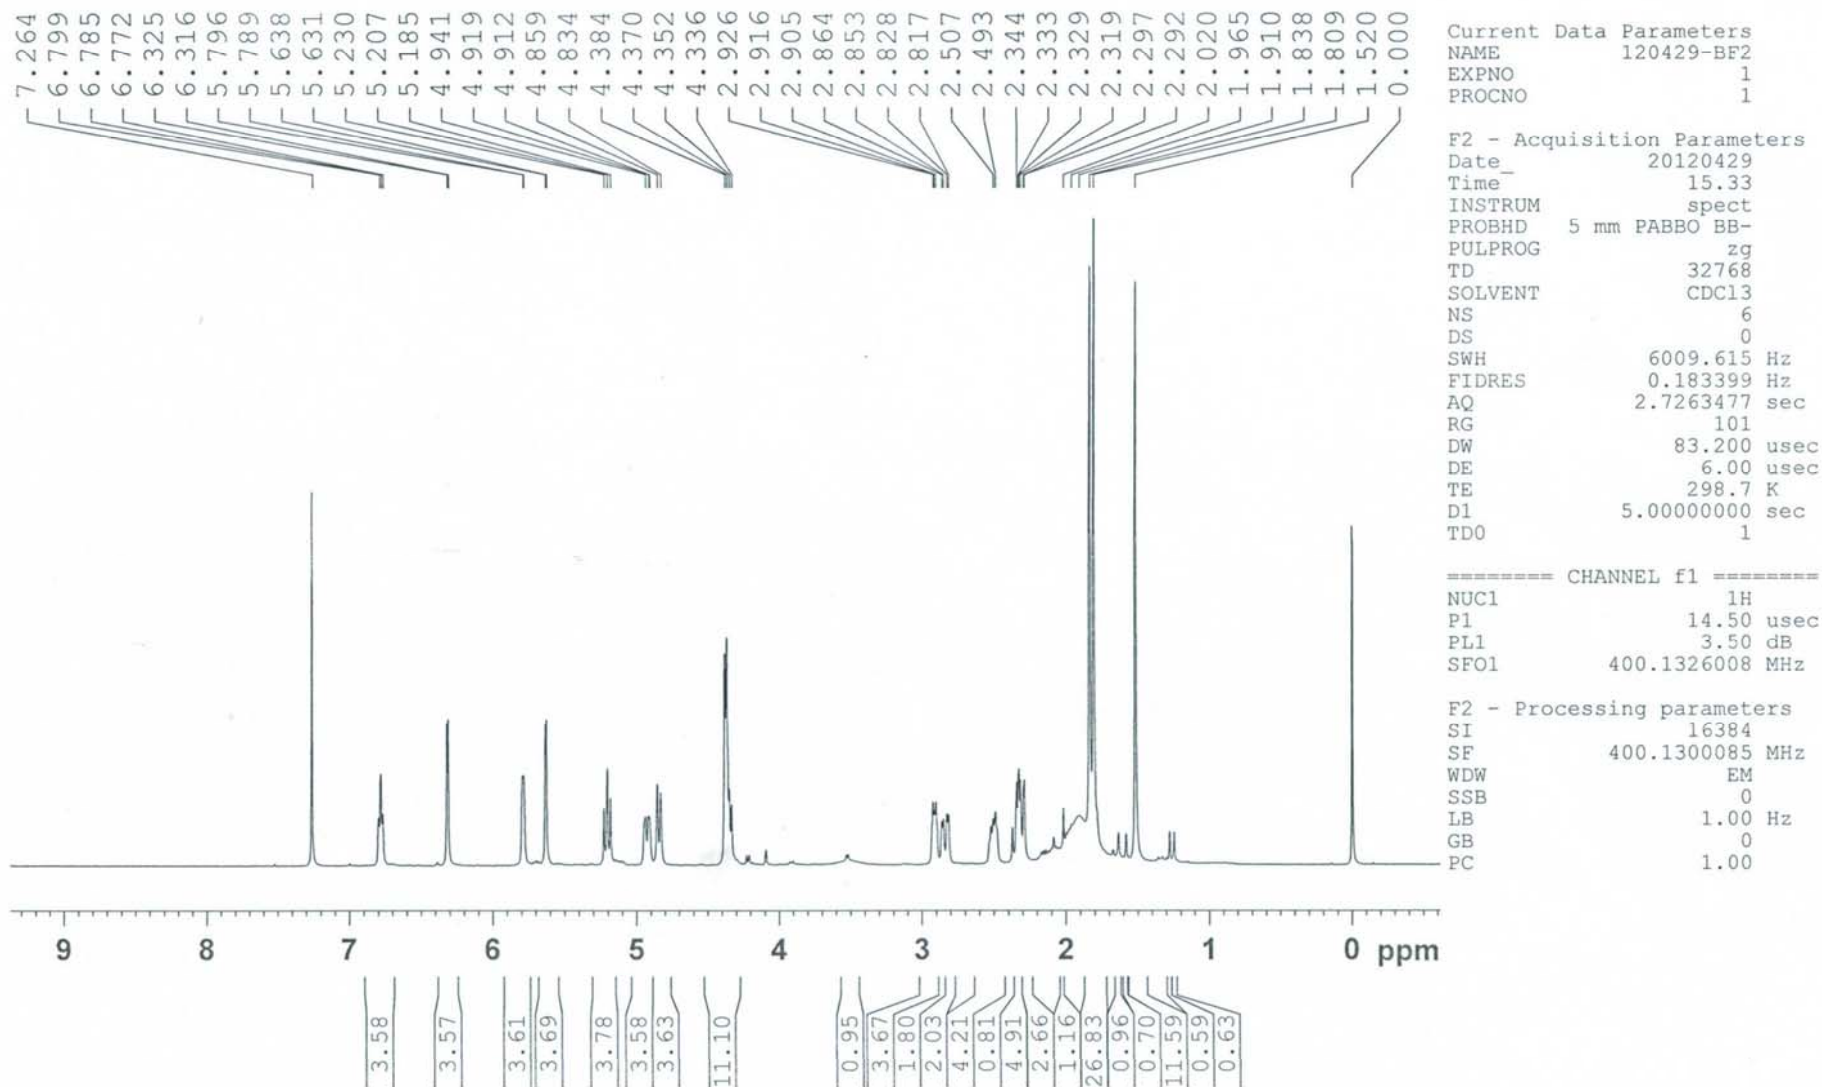

<sup>1</sup>H-NMR spectroscopy for eupalinolide A.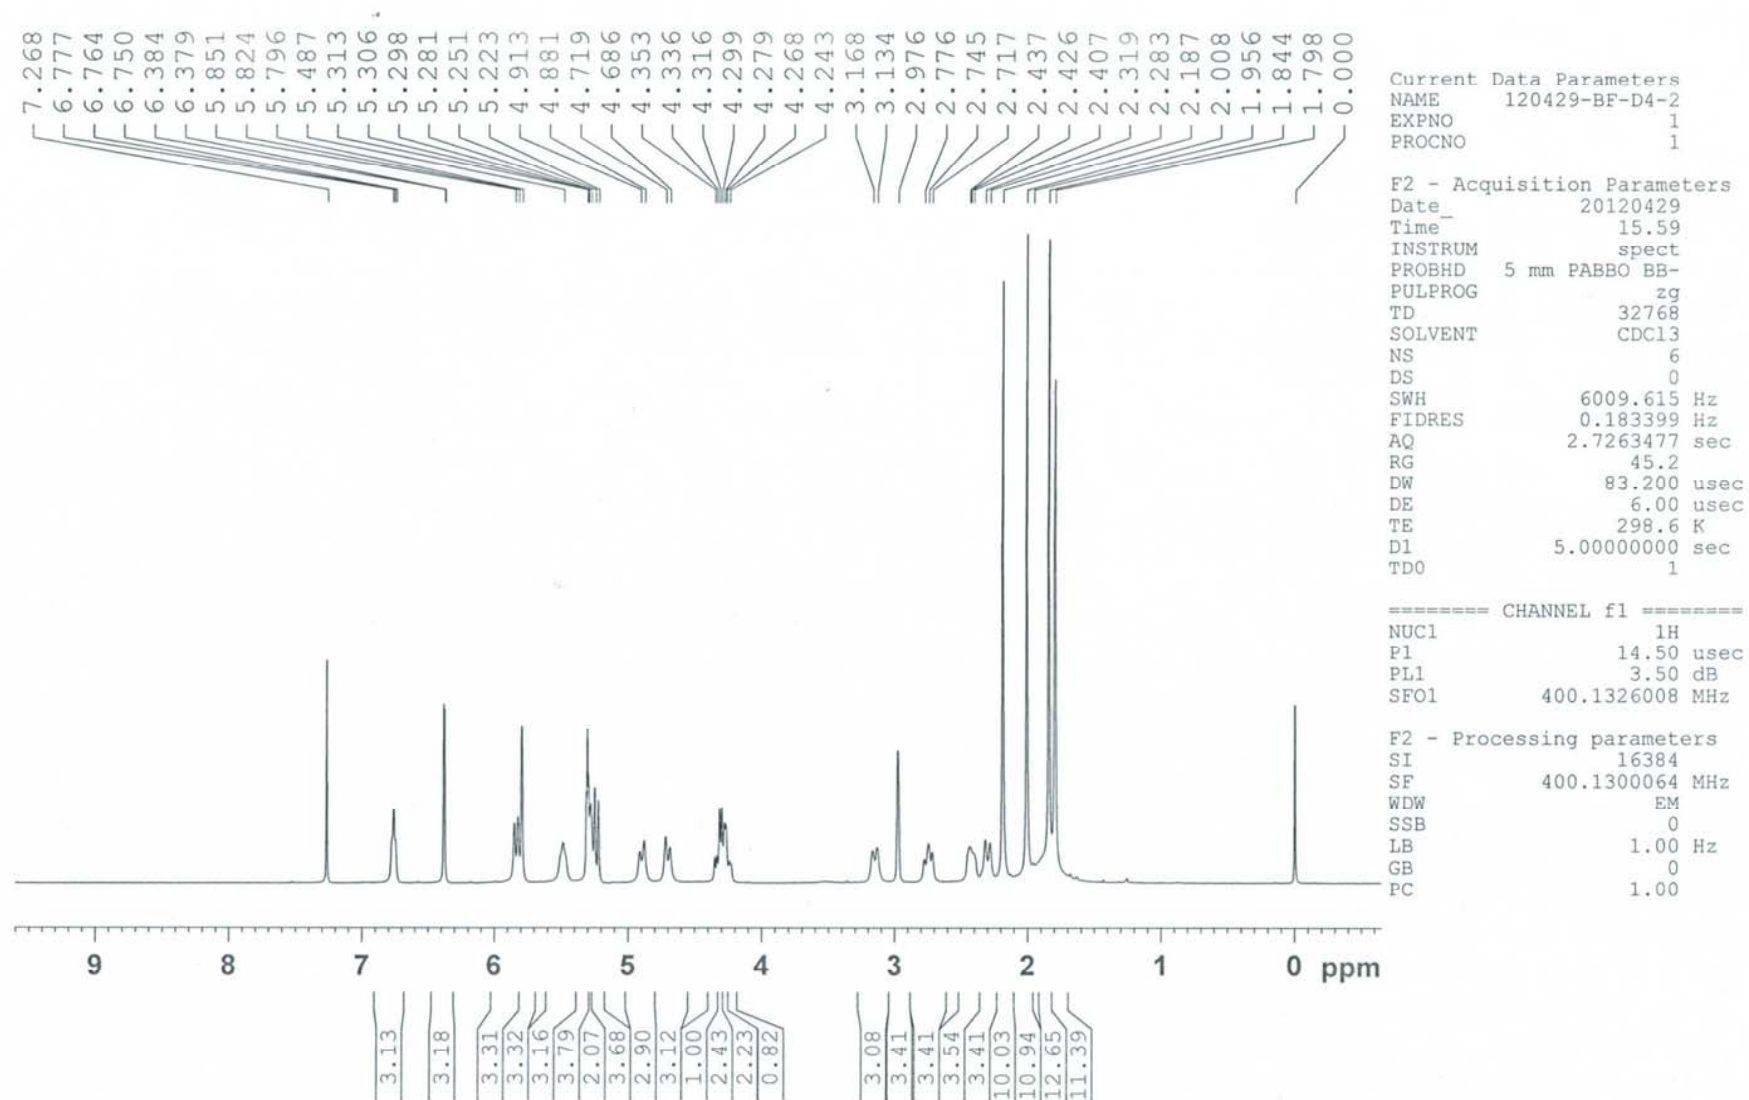

<sup>1</sup>H-NMR spectroscopy for eupalinolide B.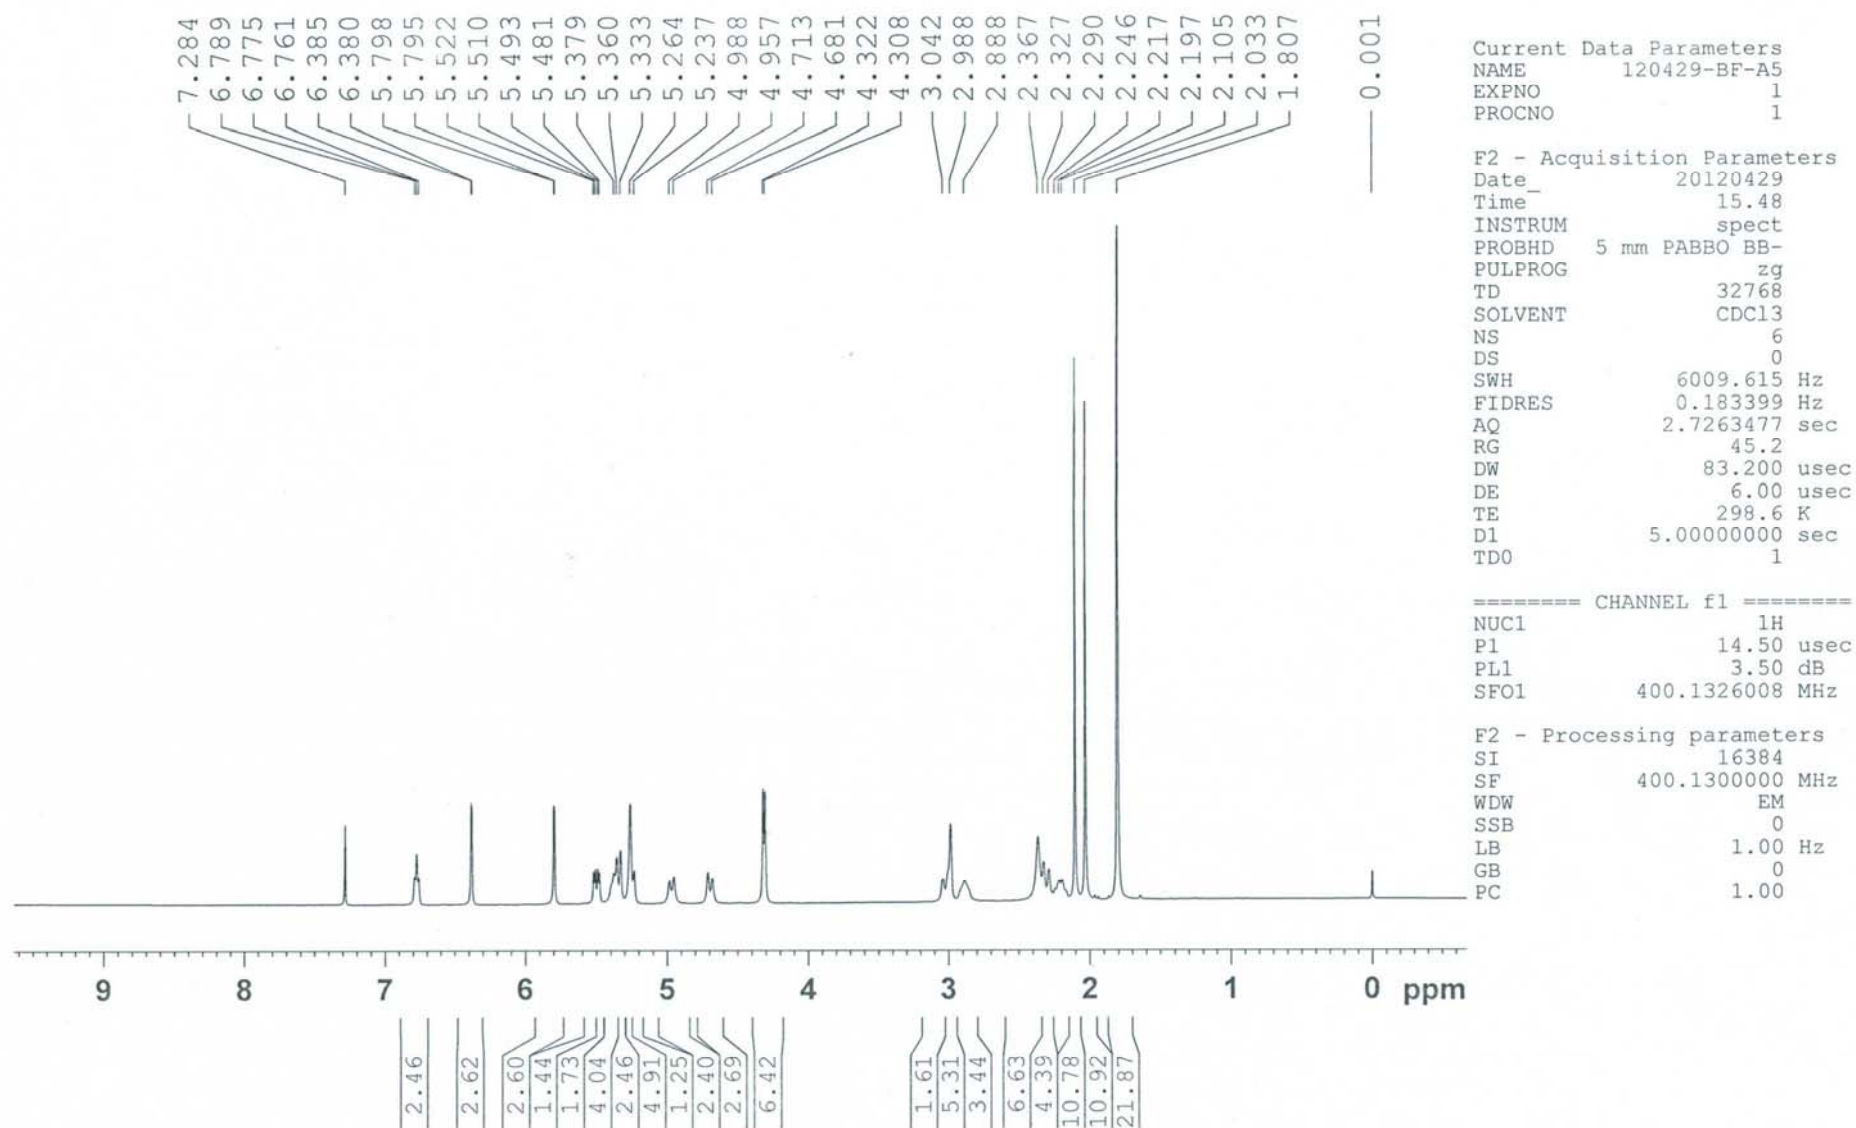

Mass spectrogram for 3 $\beta$ -Hydroxy-8 $\beta$ -[4'-hydroxytigloyloxy]-costunolide.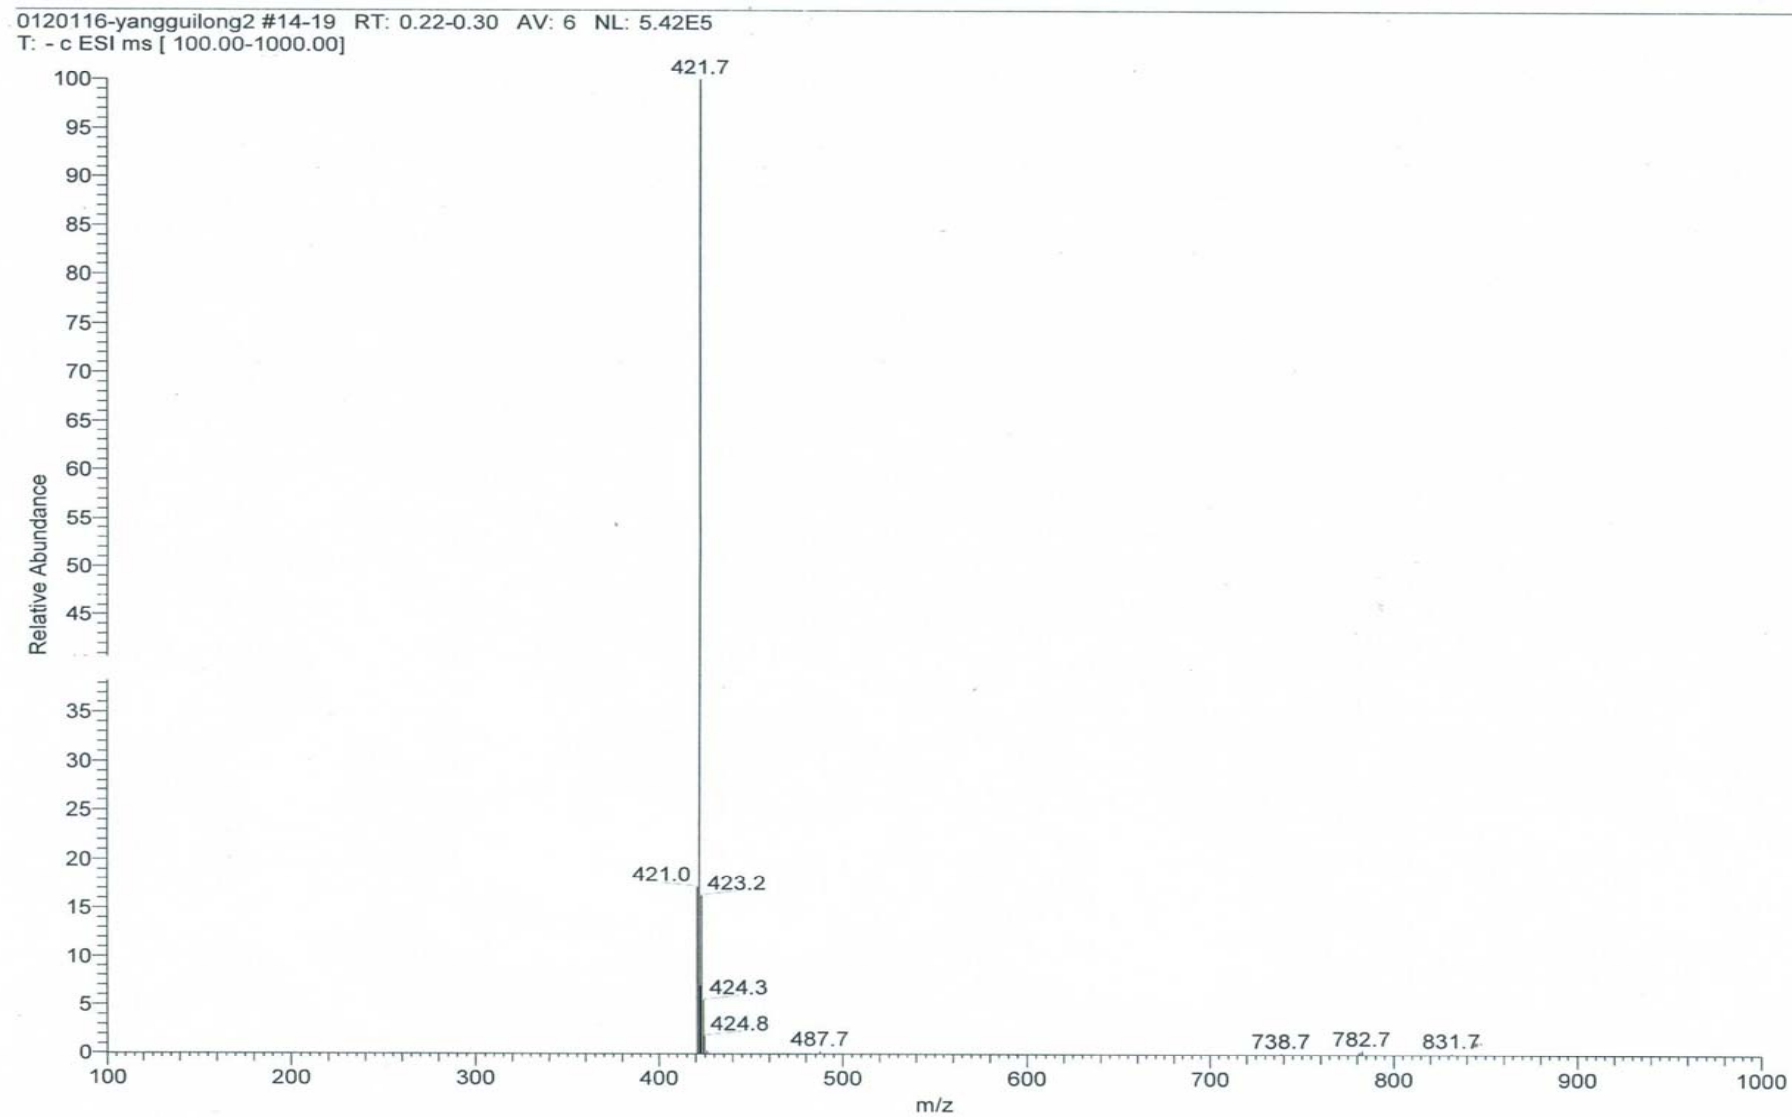

## Mass spectrogram for eupalinolide A.

20120116-yangguilong4 #110-125 RT: 2.32-2.63 AV: 16 NL: 2.00E6  
T: + c ESI Full ms [ 100.00-1500.00]

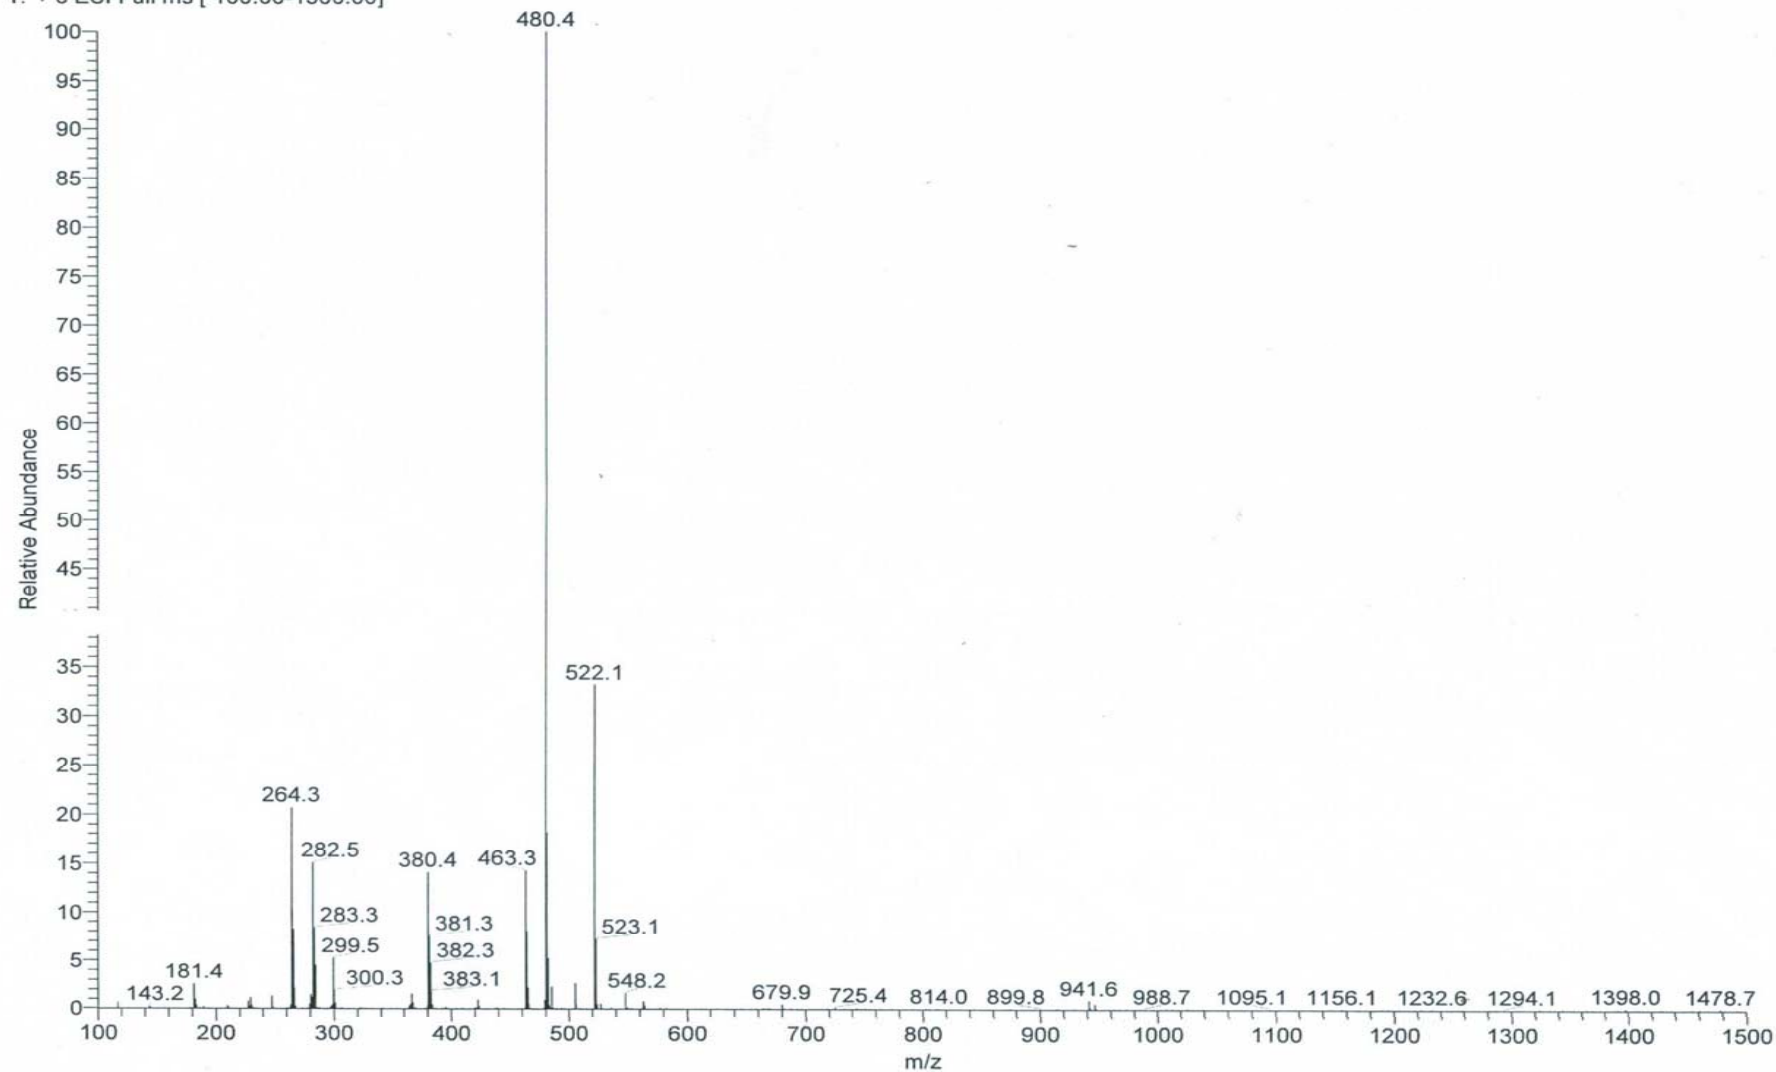

Mass spectrogram for eupalinolide B.

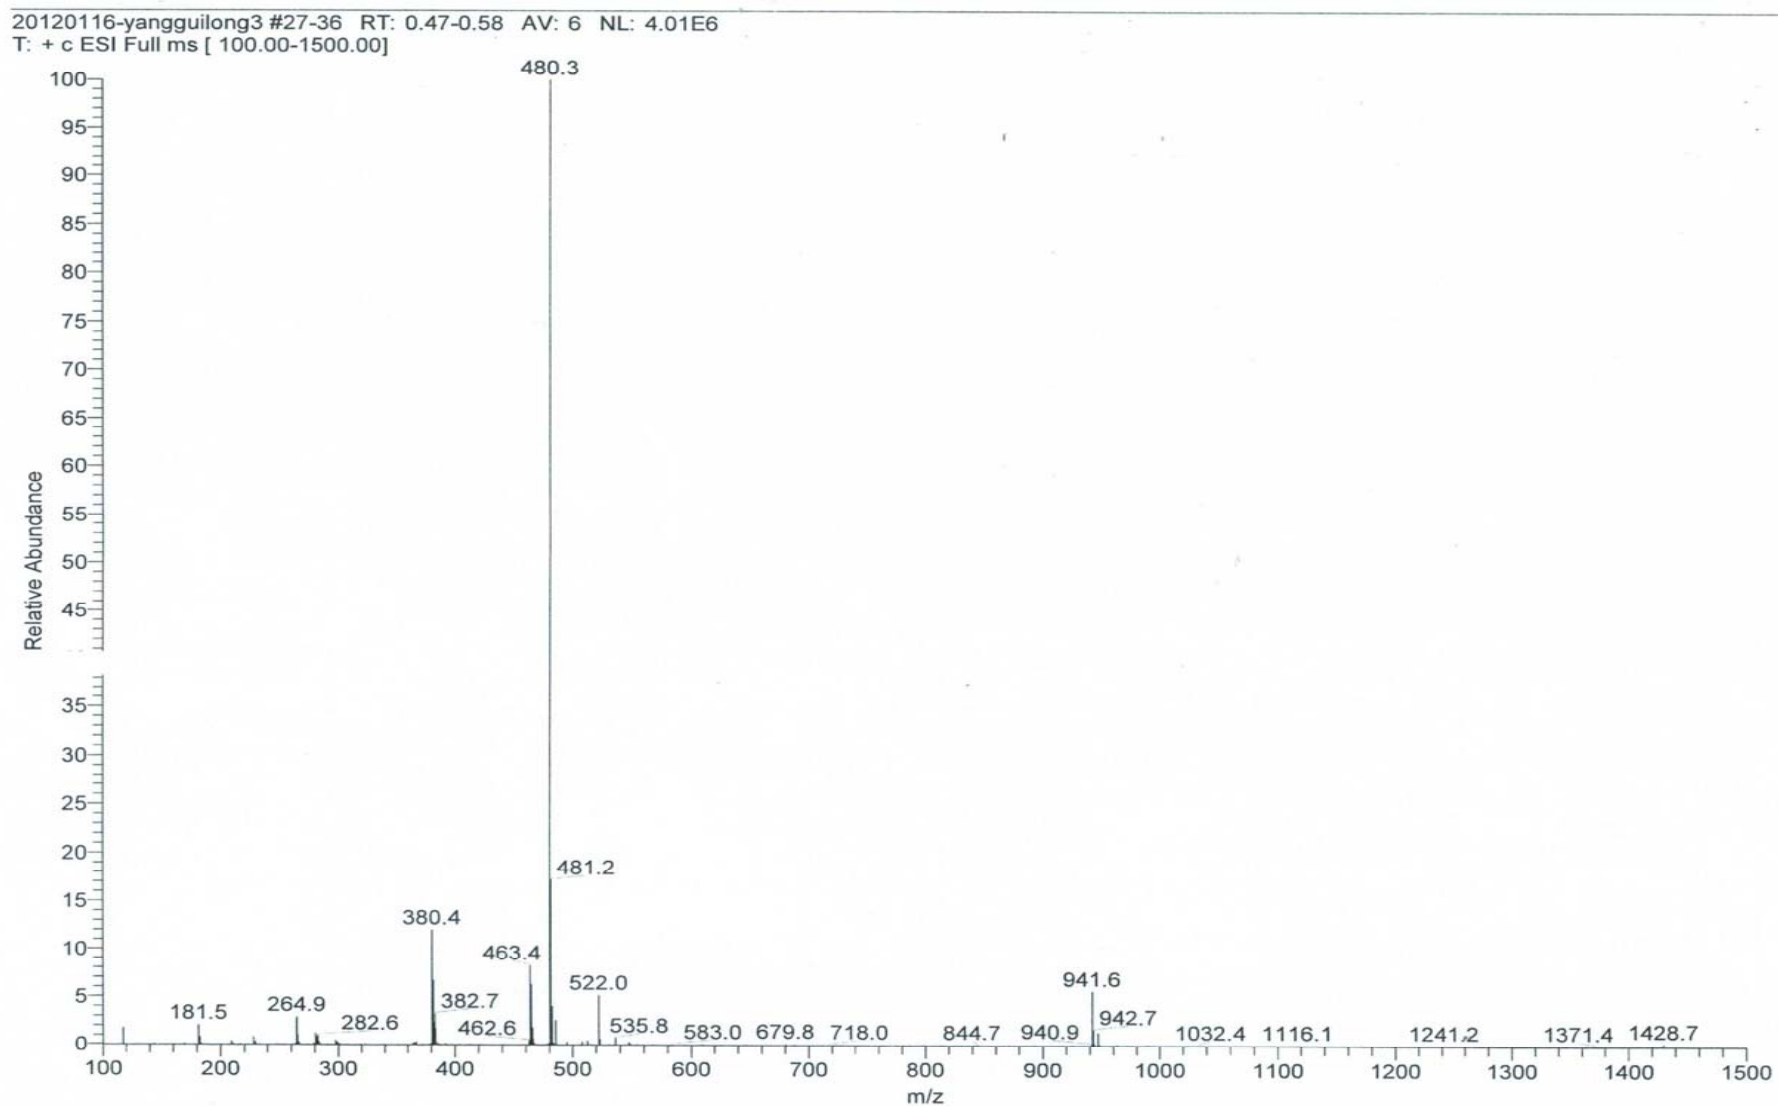

Supplement: Supplementary file 1 [file molecules-17-09002-s001.pdf]
